# Supplementary material
Source: publisher figshare collection journal article supplement (https://acs.figshare.com/ndownloader/files/26043854)
Supplement: Supplementary file 1 [file 26043854]

## Supporting Information

# **Lipid Membrane Interaction of Peptide/DNA Complexes Designed for Gene Delivery**

*Neval Yilmaz<sup>1</sup>, Yutaka Kodama<sup>1,2</sup> and Keiji Numata<sup>1,3\*</sup>*

<sup>1</sup>Biomacromolecules Research Team, RIKEN Center for Sustainable Resource Science, Wako, Saitama, Japan

<sup>2</sup>Center for Bioscience Research & Education, Utsunomiya University, Tochigi, Japan

<sup>3</sup>Laboratory for Biomaterial Chemistry, Department of Material Chemistry, Graduate School of Engineering, Kyoto University, Japan

\*e-mail: numata.keiji.3n@kyoto-u.ac.jp

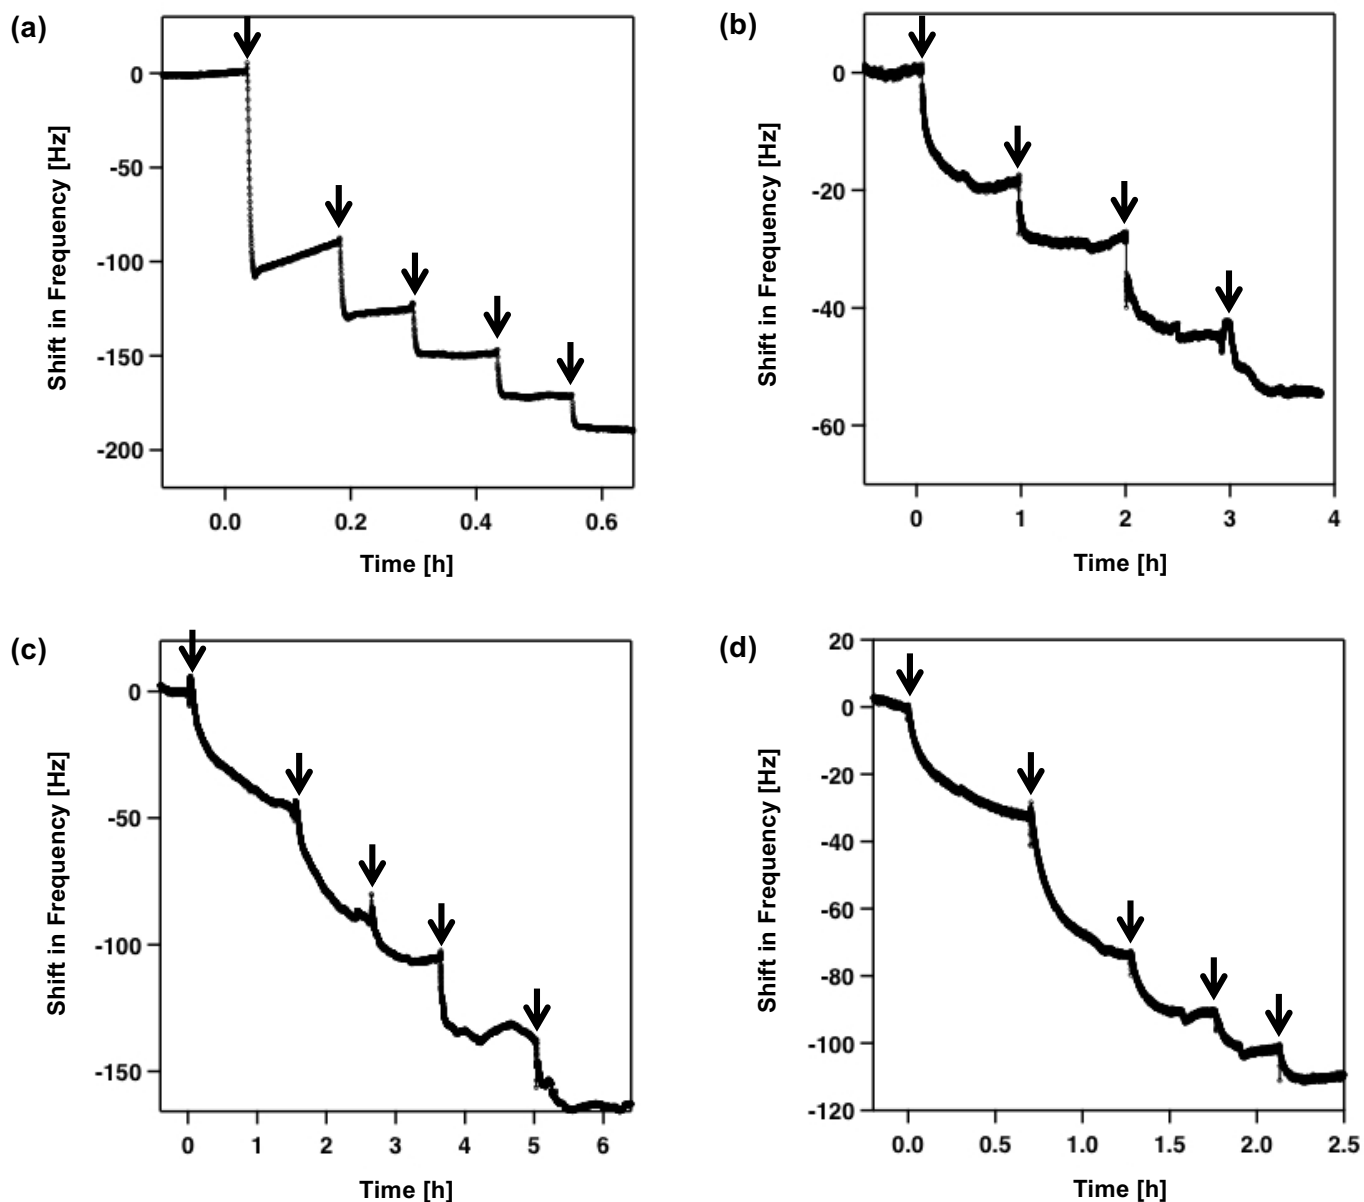

**Figure S1.** Time-course plots showing the binding of Cytcox **(a)**, BP100 **(b)**, Cytcox-KH<sub>9</sub> **(c)**, and BP100-KH<sub>9</sub> **(d)** to Plasma-MM. The arrows indicate the injection of the peptide. The concentrations of the injected amounts of Cytcox, BP100, Cytcox-KH<sub>9</sub>, and BP100-KH<sub>9</sub> were 41, 2.2, 1.3, and 0.7  $\mu$ M, respectively.

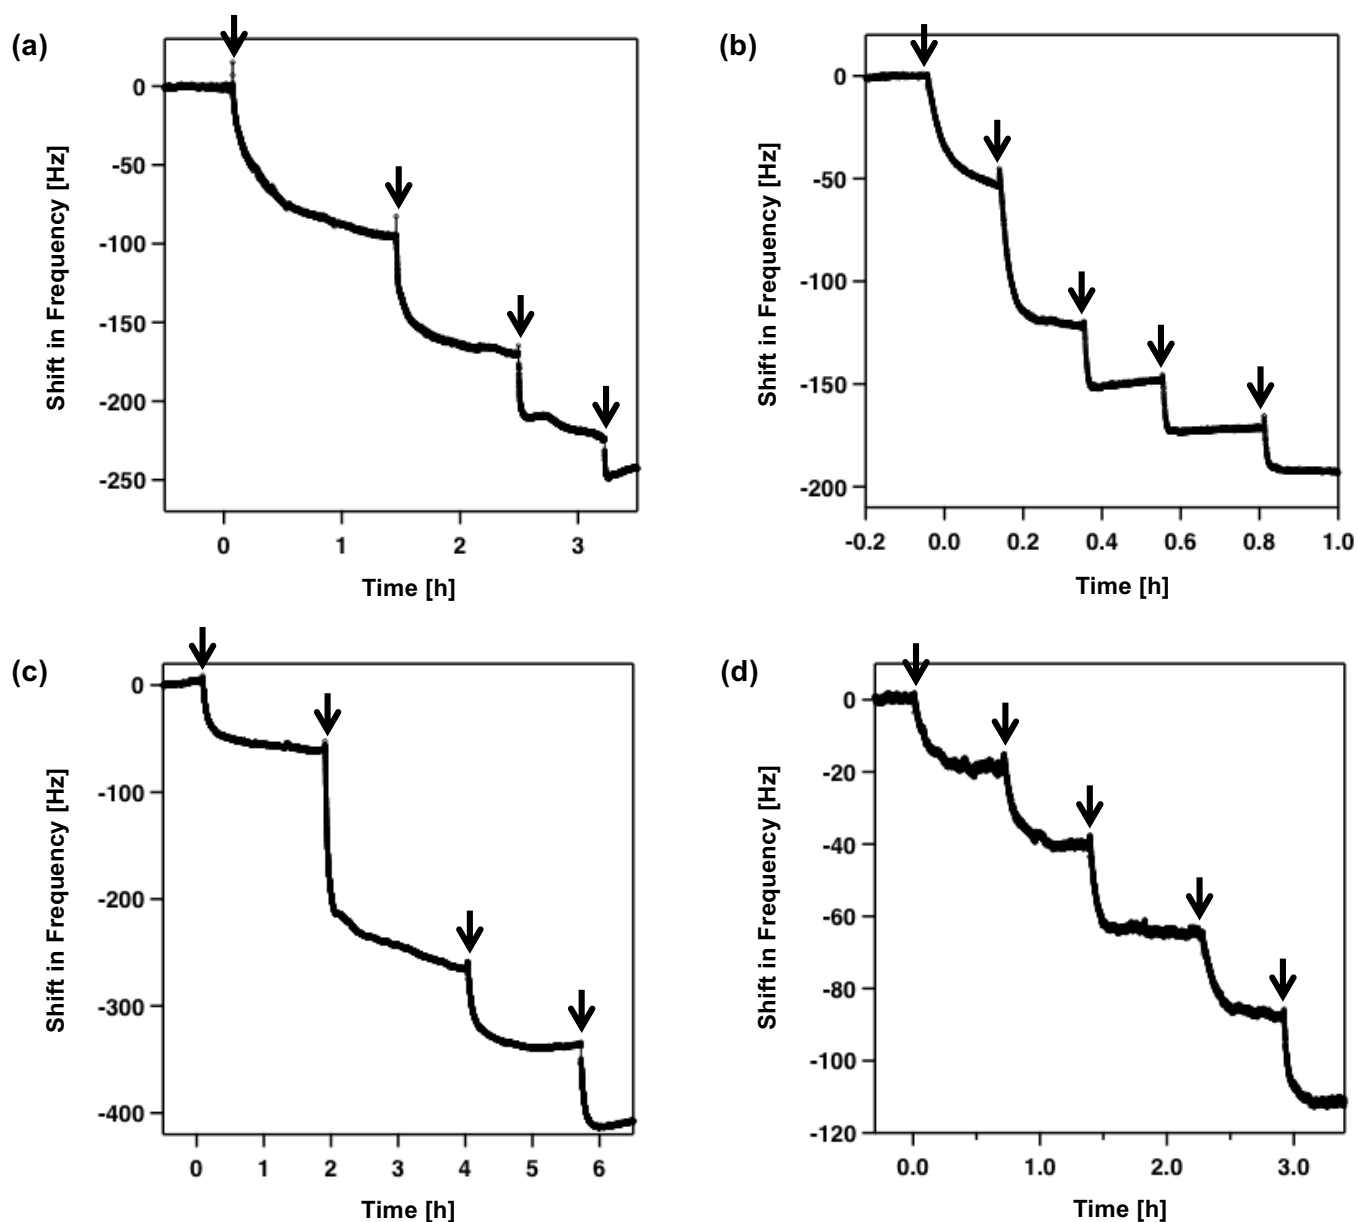

**Figure S2.** Time-course plots showing the binding of Cytcox **(a)**, BP100 **(b)**, Cytcox-KH<sub>9</sub> **(c)**, and BP100-KH<sub>9</sub> **(d)** to Mito-MM. The arrows indicate the injection of the peptide. The concentrations of the injected amounts of Cytcox, BP100, Cytcox-KH<sub>9</sub>, and BP100-KH<sub>9</sub> were 8.3, 9.1, 1.3, and 0.7  $\mu$ M, respectively.

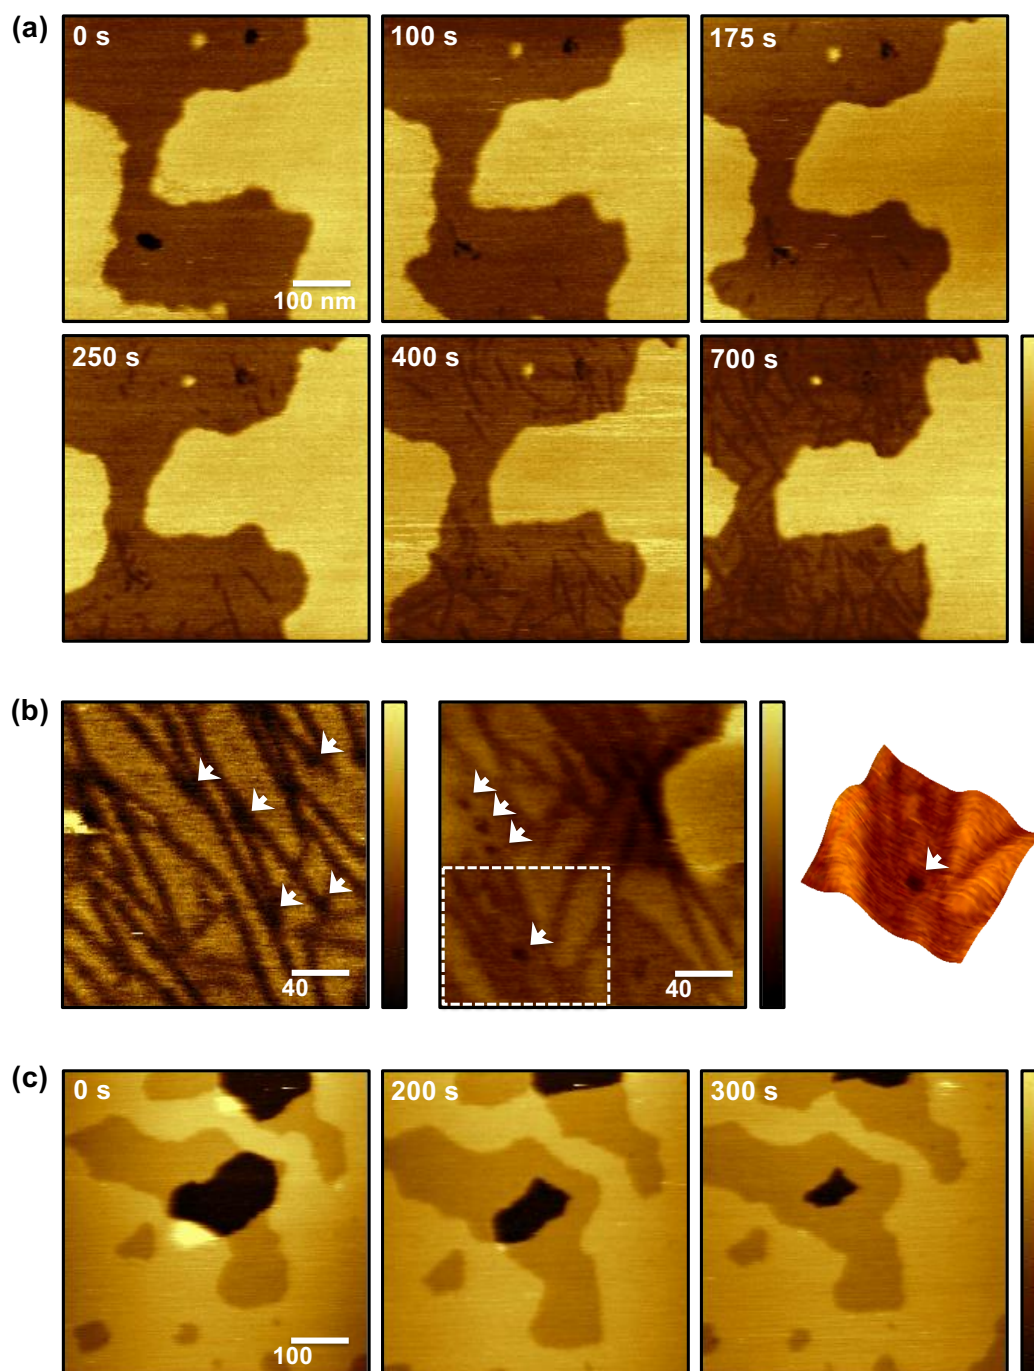

**Figure S3.** HS-AFM height images showing the changes in Plasma-MM in the presence of 8  $\mu\text{M}$  Cytcox (a, b) and 9  $\mu\text{M}$  BP100 (c). “0 s” in A and C correspond to approximately 5 and 9 min after addition of Cytcox and BP100, respectively. The arrows in B point to the pore-like defects. The 3D image is the region in the dashed line box. The color bar indicates the Z-range between 0 (darkest) to  $Z_{\max}$  (brightest);  $Z_{\max}(\text{a}) = 9 \text{ nm}$ ,  $Z_{\max}(\text{b}) = 2.5 \text{ nm}$  (left), 6 nm (right), and  $Z_{\max}(\text{c}) = 10 \text{ nm}$ .



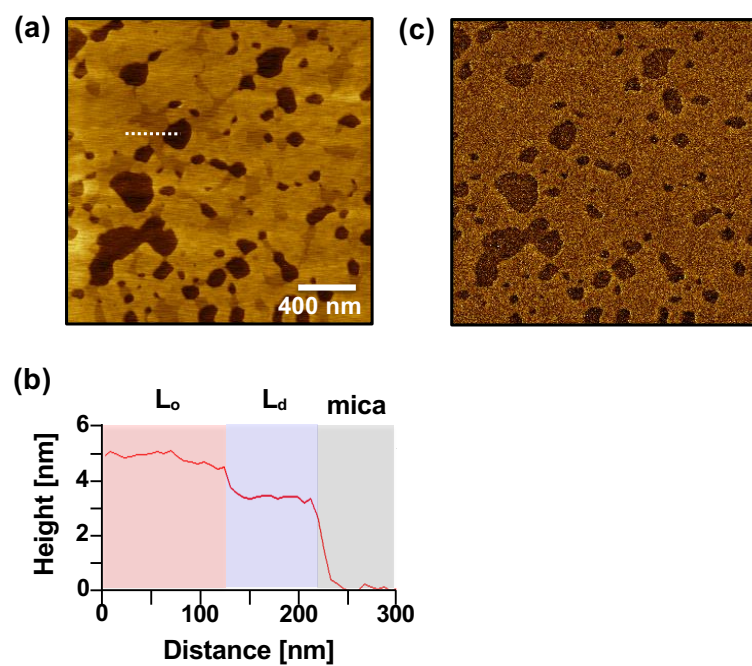

**Figure S4.** HS-AFM height (a) and phase (c) images showing the height and phase variation in plasma-MM. (b) Height profile along the dashed line in (a).

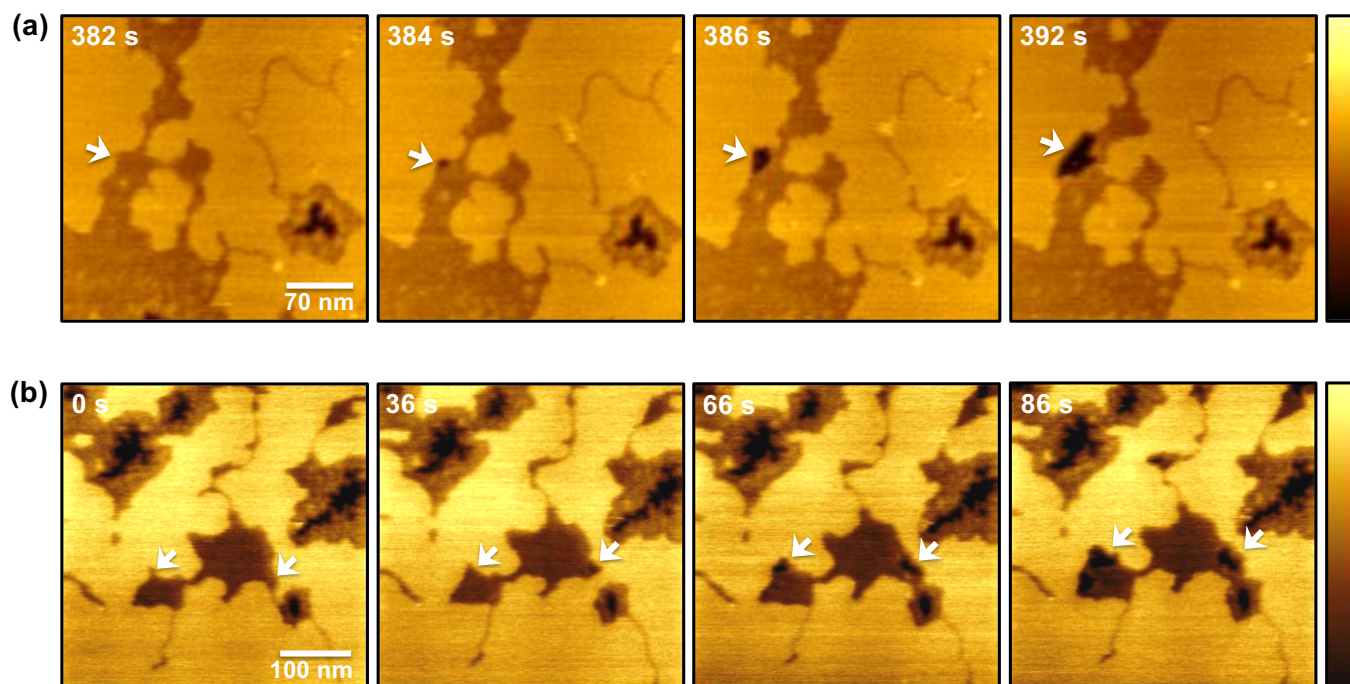

**Figure S5.** HS-AFM height images showing the pore formation in Plasma-MM in the presence of 3  $\mu\text{M}$  Cytcox-KH<sub>9</sub> (a) and 0.5  $\mu\text{M}$  BP100-KH<sub>9</sub> (b). “0 s” in (b) corresponds to 28 min after addition of BP100-KH<sub>9</sub> and 26 min after the start of observation in Figure 4b. The arrows point to the pores. The color bar indicates the Z-range between 0 (darkest) to  $Z_{\text{max}}$  (brightest);  $Z_{\text{max}}$ (a, b) = 5 nm.

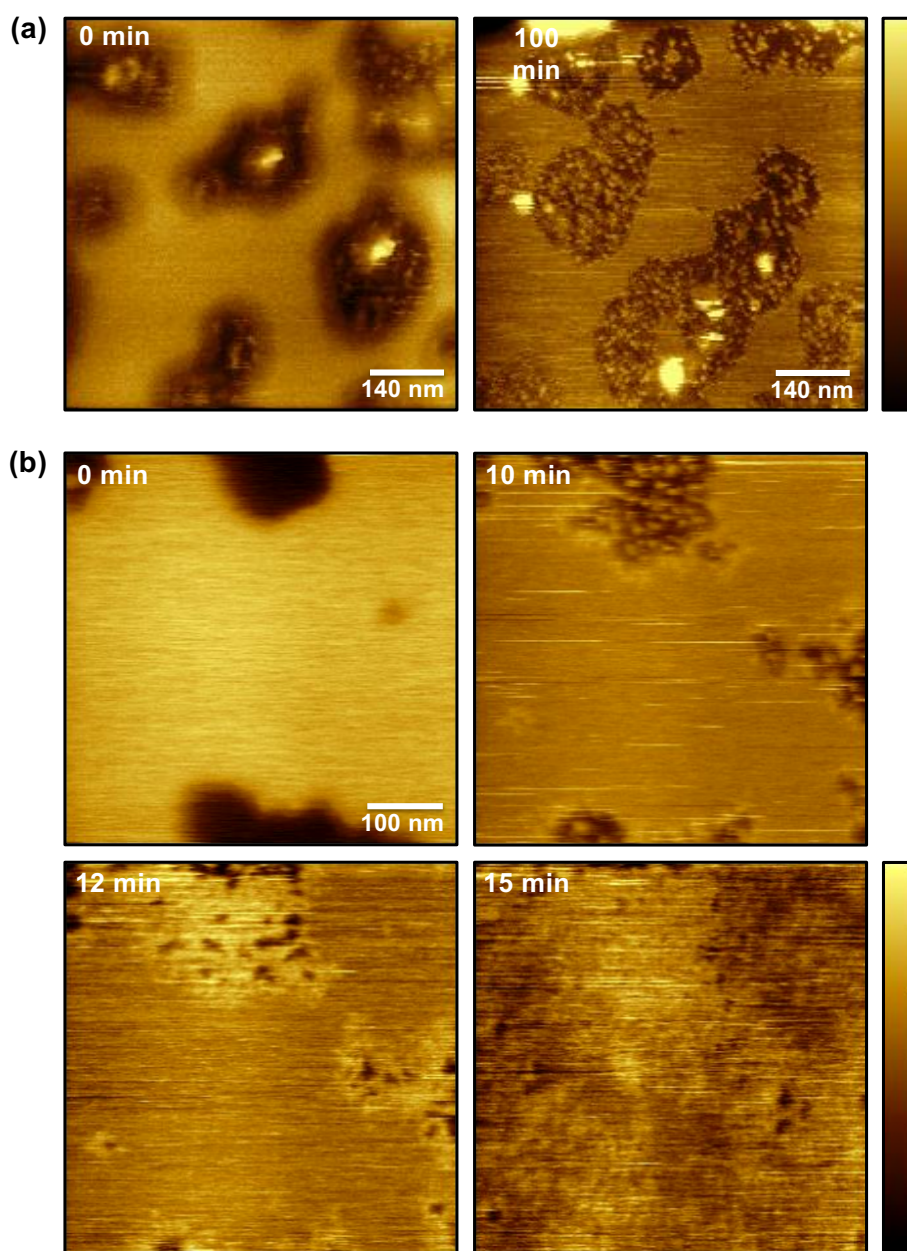

**Figure S6.** HS-AFM height images showing the changes in Mito-MM in the presence of 12  $\mu\text{M}$  Cytcox (a) and 1.3  $\mu\text{M}$  Cytcox-KH<sub>9</sub> (b). “0 min” corresponds to the time just after addition of peptide. The color bar indicates the Z-range between 0 (darkest) to  $Z_{\text{max}}$  (brightest);  $Z_{\text{max}}$ (a) = 7 nm and  $Z_{\text{max}}$ (b) = 6 nm (0 min, 10 min), 4 nm (12 min), 3 nm (15 min).

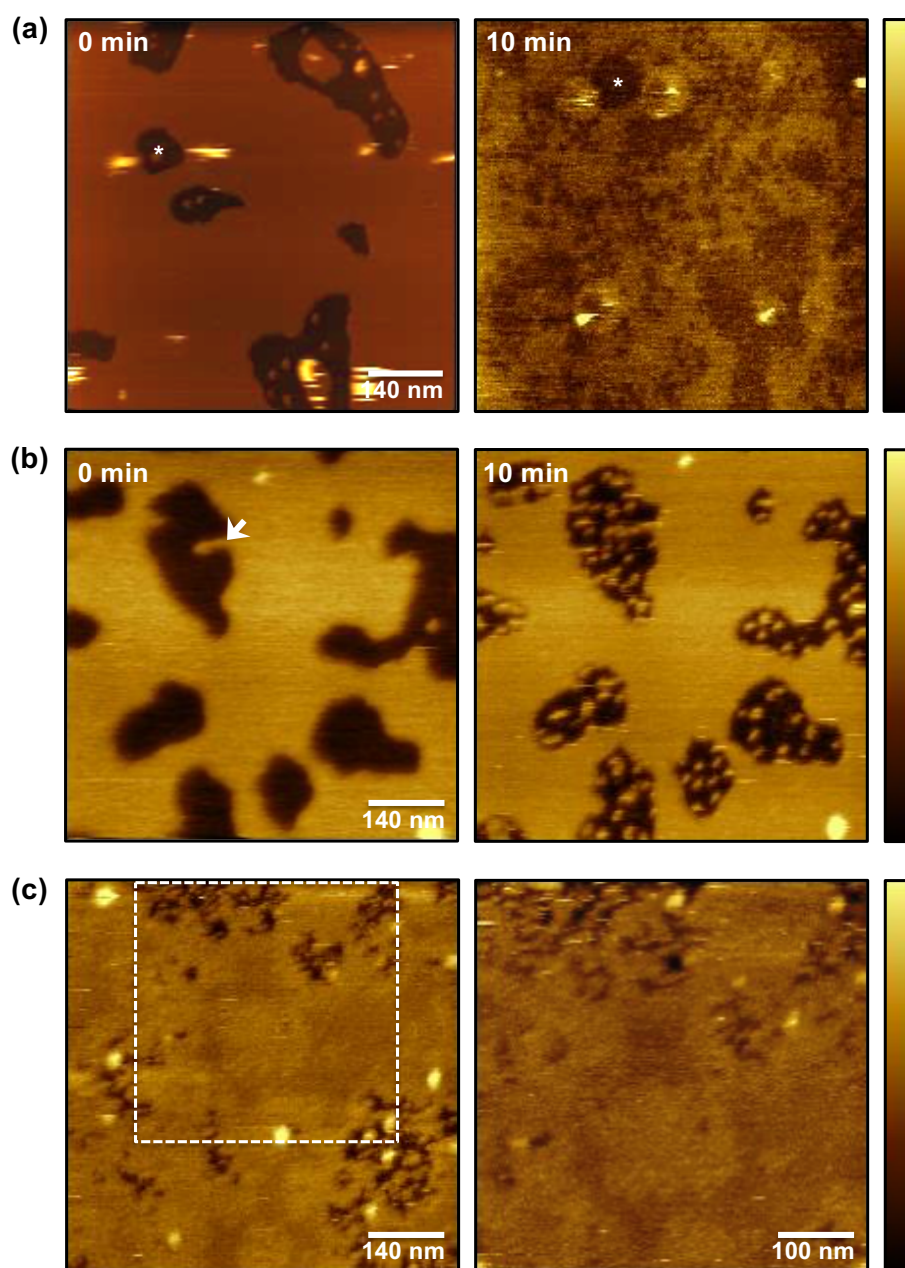

**Figure S7.** HS-AFM height images showing the changes in Mito-MM in the presence of 9 μM BP100 (a) and 0.4 μM BP100-KH<sub>9</sub> (b, c). “0 min” corresponds to the time just after addition of peptide. The arrow in (b) points to the tubule-like structure protruding from the membrane in the presence of BP100-KH<sub>9</sub>. The images in (c) show the thin layer formed on Mito-MM 45 min after addition of BP100-KH<sub>9</sub>. The image to the right is the higher-resolution image of the region in the dashed line box. The color bar indicates the Z-range between 0 (darkest) to Z<sub>max</sub> (brightest); Z<sub>max</sub>(a) = 40 nm (0 min), 5 nm (10 min), Z<sub>max</sub>(b) = 12 nm, and Z<sub>max</sub>(c) = 10 nm.

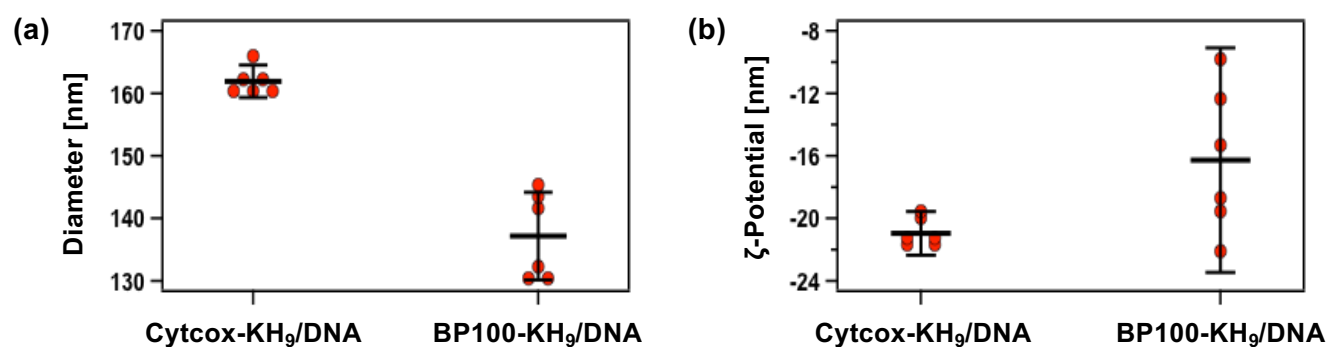

**Figure S8.** Hydrodynamic size **(a)** and  $\zeta$ -potential **(b)** of Cytcox-KH<sub>9</sub>/DNA and BP100-KH<sub>9</sub>/DNA complexes measured by DLS. The number of data points was 6 for each measurement. The highest and lowest lines indicate the standard deviation from the mean value (centered line).



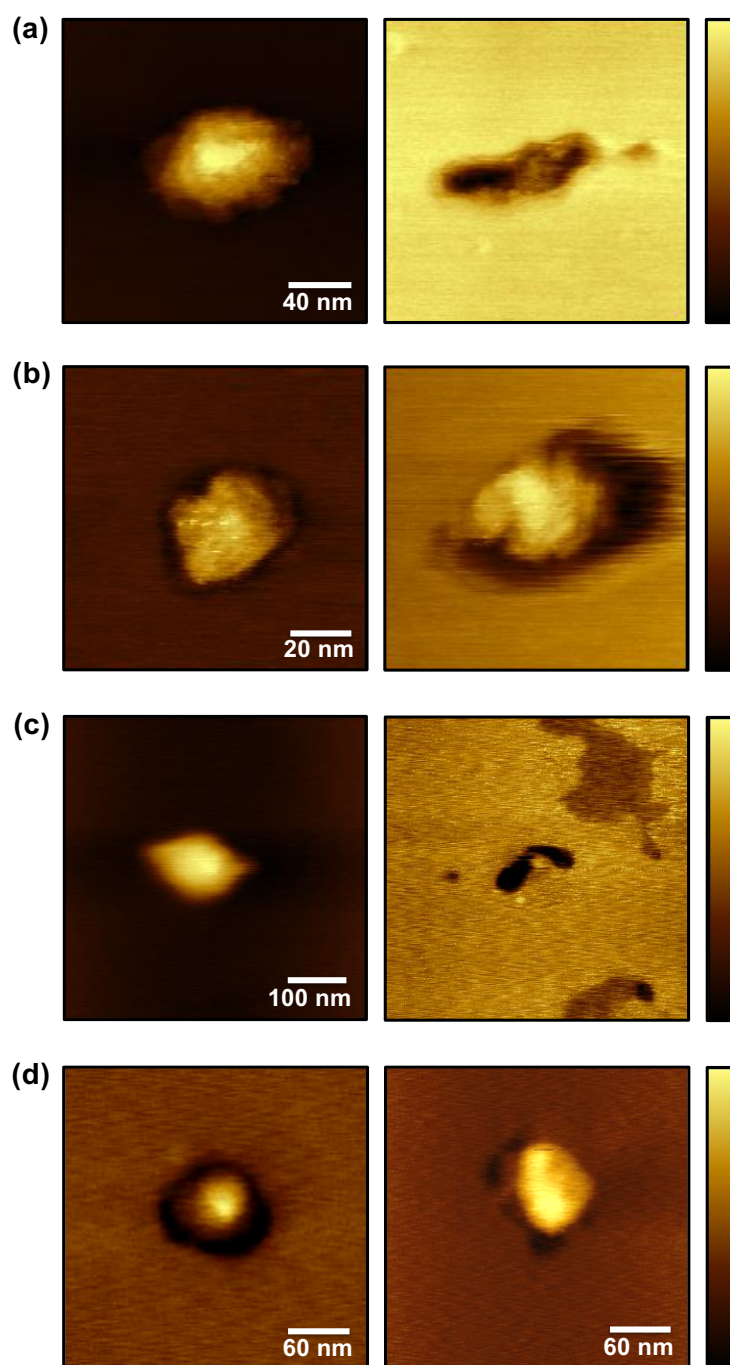

**Figure S9.** HS-AFM height images showing the complexes of Cytcox-KH<sub>9</sub>/DNA **(a-c)** and BP100-KH<sub>9</sub>/DNA **(d)** on Plasma-MM. The images to the right in (a)-(c) were recorded at a higher imaging force to reveal the disrupted region by Cytcox-KH<sub>9</sub>/DNA complex. The images in (d) show the disrupted regions of the membrane around BP100-KH<sub>9</sub>/DNA complex. The color bar indicates the Z-range between 0 (darkest) to  $Z_{\max}$  (brightest);  $Z_{\max}(\text{a}) = 22 \text{ nm}$  (left), 6 nm (right),  $Z_{\max}(\text{b}) = 6 \text{ nm}$  (left), 8 nm (right),  $Z_{\max}(\text{c}) = 40 \text{ nm}$  (left), 6 nm (right), and  $Z_{\max}(\text{d}) = 13 \text{ nm}$ .

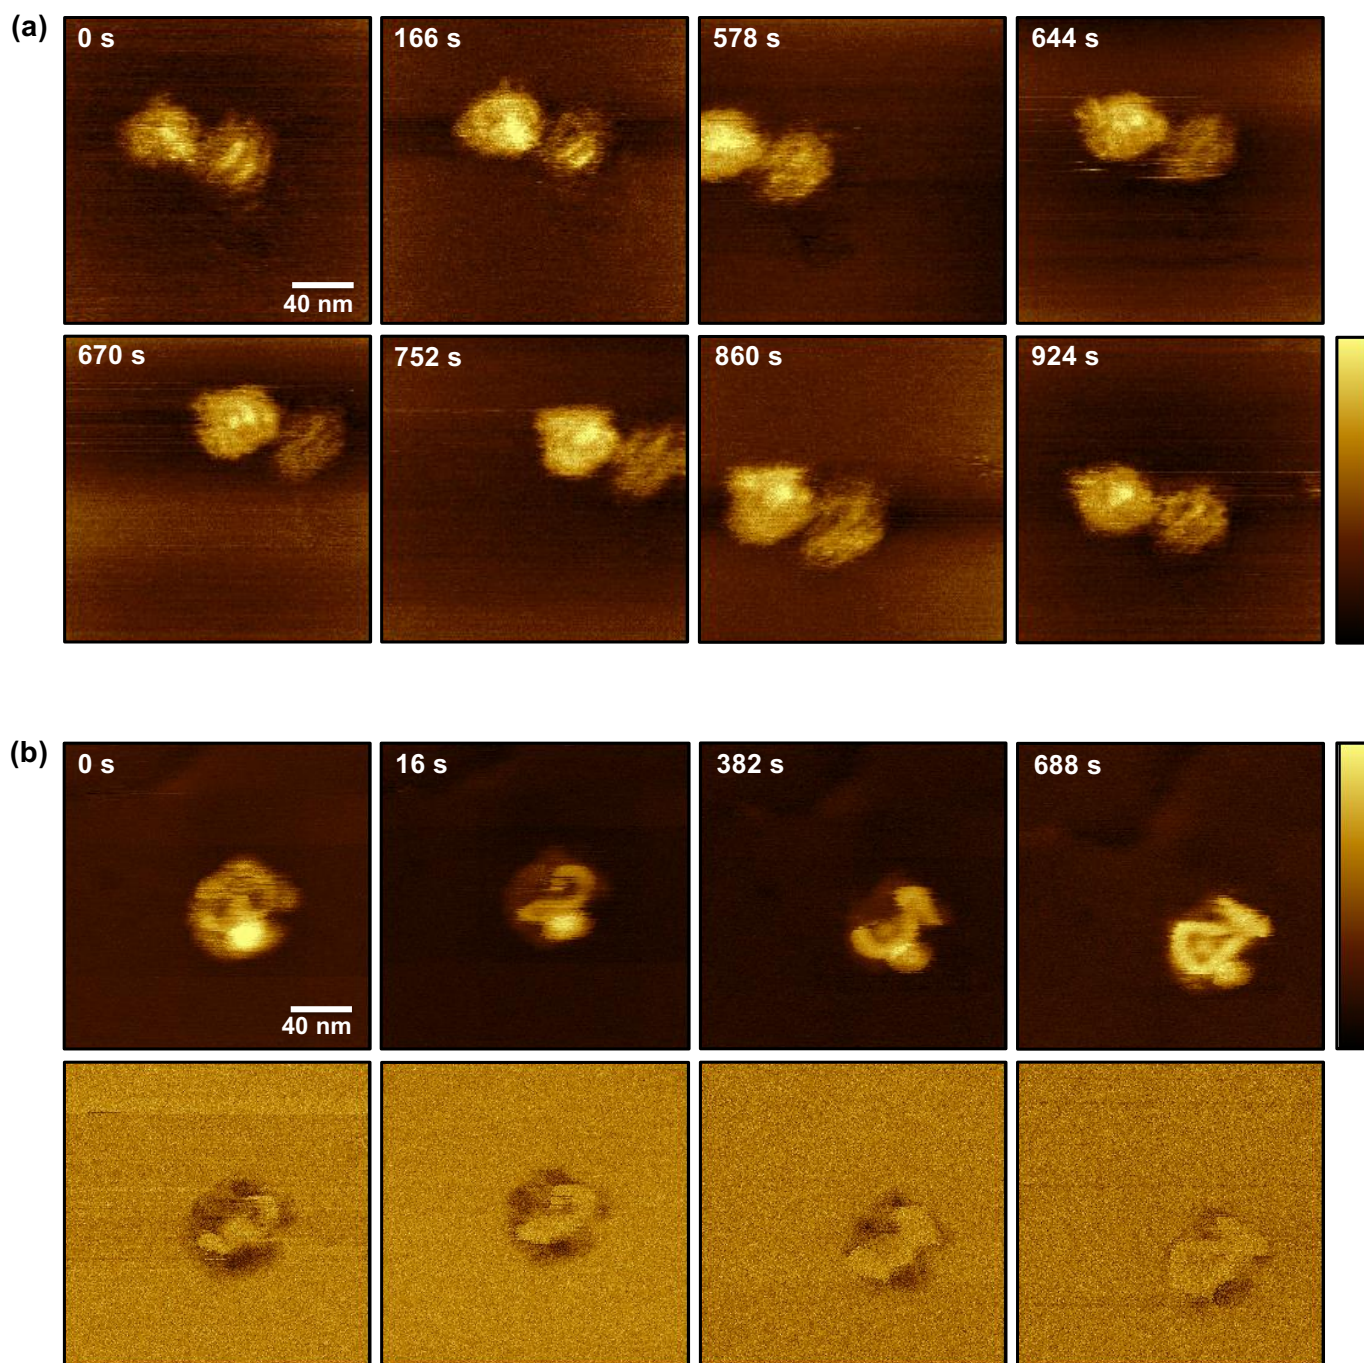

**Figure S10.** HS-AFM height images of Cytcox-KH<sub>9</sub>/DNA complex on Plasma-MM (**a**, **b**) at pH 5.8 in 20 mM MES containing 150 mM NaCl. The phase images in the lower row in (**b**) show the DNA-rich region of the complex on the peptide-rich darker region. The color bar indicates the Z-range between 0 (darkest) to  $Z_{\max}$  (brightest);  $Z_{\max}(\text{a}) = 10$  nm and  $Z_{\max}(\text{b}) = 8$  nm.



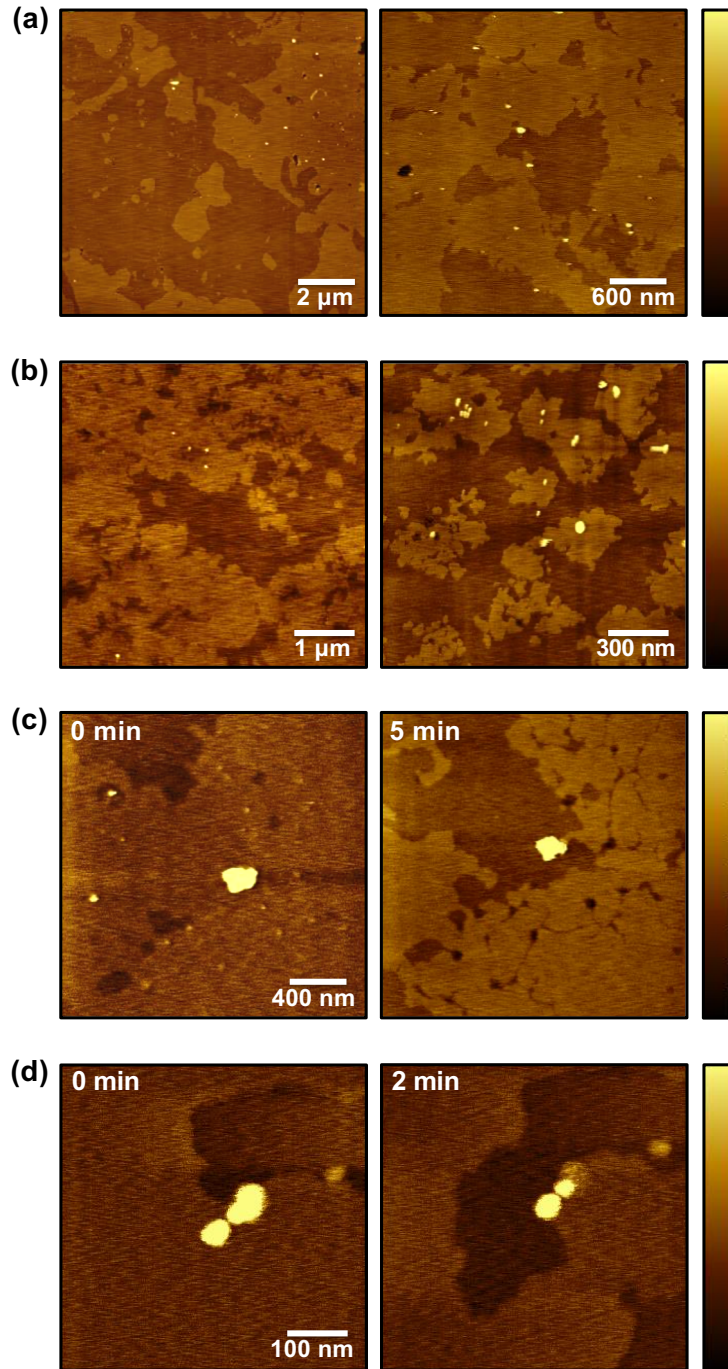

**Figure S11.** HS-AFM height images showing the localization of Cytcox-KH<sub>9</sub>/DNA complex **(a)** and BP100-KH<sub>9</sub>/DNA complex **(b)** on L<sub>o</sub> domains of Plasma-MM and fluidization of L<sub>o</sub> domains by Cytcox-KH<sub>9</sub>/DNA complex **(c)** and BP100-KH<sub>9</sub>/DNA complex **(d)**. The color bar indicates the Z-range between 0 (darkest) to  $Z_{\max}$  (brightest);  $Z_{\max}$ (a) = 15 nm,  $Z_{\max}$ (b) = 10 nm,  $Z_{\max}$ (c) = 7.5 nm (0 min), 10 nm (5 min), and  $Z_{\max}$ (d) = 7 nm.



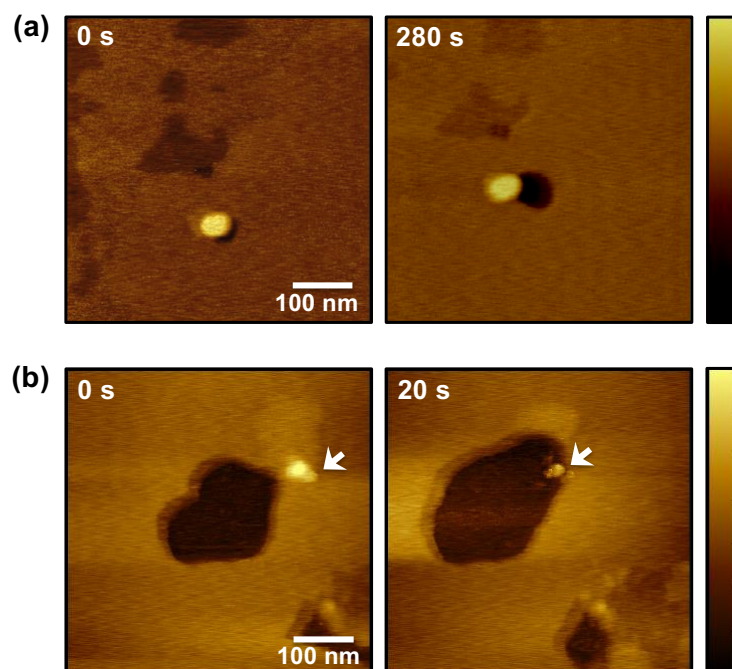

**Figure S12.** HS-AFM height images showing the pore formation by Cytcox-KH<sub>9</sub>/DNA complex in Plasma-MM **(a, b)**. The color bar indicates the Z-range between 0 (darkest) to  $Z_{\max}$  (brightest);  $Z_{\max}(\text{a}) = 10 \text{ nm}$  (0 s), 14 nm (280 s) and  $Z_{\max}(\text{b}) = 14 \text{ nm}$ .

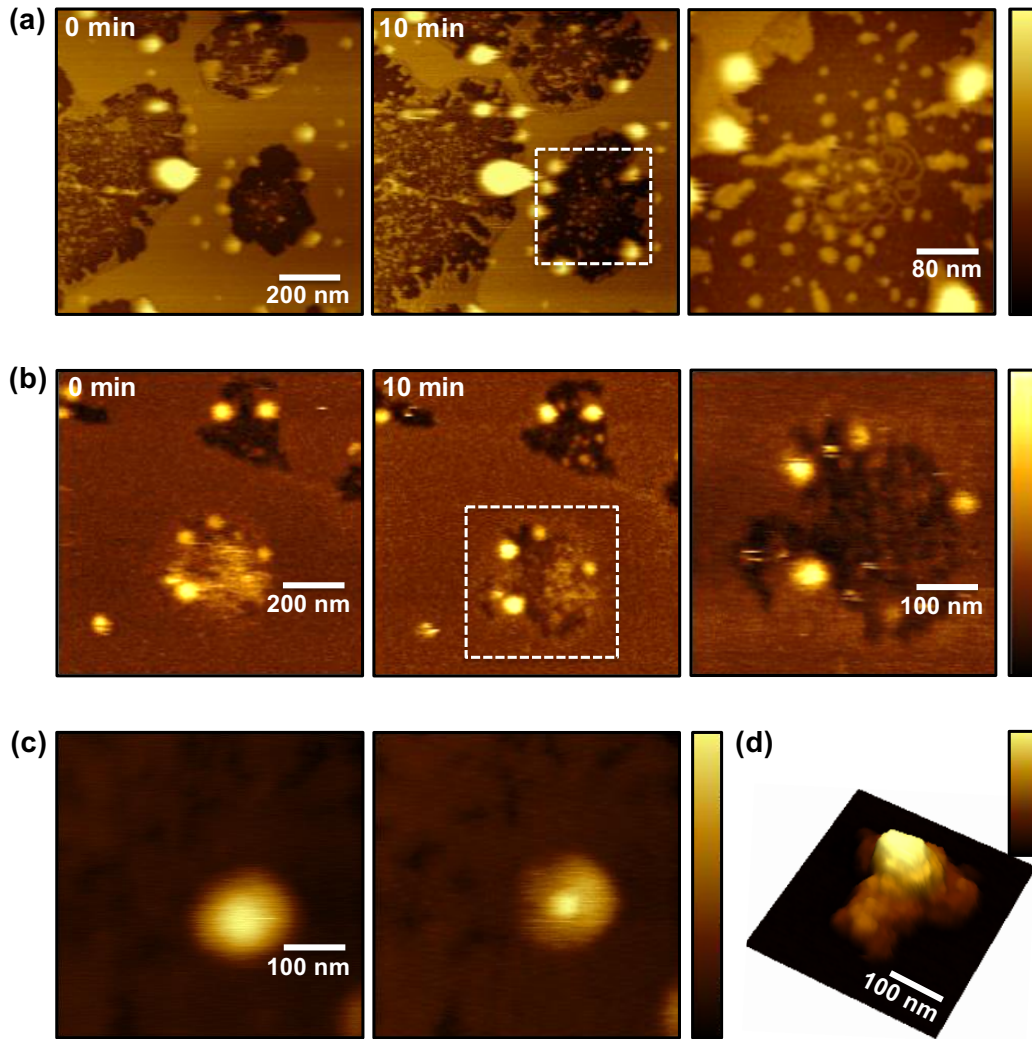

**Figure S13.** HS-AFM height images showing the disruption in Mito-MM caused by Cytcox-KH<sub>9</sub>/DNA complex **(a)** and BP100-KH<sub>9</sub>/DNA complex **(b)**. “0 min” corresponds to 4 h in a and b after addition of 40  $\mu$ L of complex into the imaging medium. The third images in A and B are the higher-resolution images of the regions within the dashed line boxes in the second images. The images in **(c)** and **(d)** show the intact complex and the partially-dissociated complex on the membrane. The image to the right in (c) was recorded at a higher imaging force. The color bar indicates the Z-range between 0 (darkest) to  $Z_{\max}$  (brightest);  $Z_{\max}(\text{a}) = 20$  nm,  $Z_{\max}(\text{b}) = 25$  nm,  $Z_{\max}(\text{c}) = 32$  nm (left), 25 nm (right), and  $Z_{\max}(\text{d}) = 100$  nm.

## **Movies**

**Movie 1.** Cytcox-induced changes in Plasma-MM. Scan rate was 0.5 frame/s.

**Movie 2.** BP100-induced changes in Plasma-MM. Scan rate was 0.5 frame/s.

**Movie 3.** Cytcox-KH<sub>9</sub>-induced changes in Plasma-MM. Scan rate was 0.5 frame/s.

**Movie 4.** BP100-KH<sub>9</sub>-induced changes in Plasma-MM. Scan rate was 0.5 frame/s.

**Movie 5.** BP100-KH<sub>9</sub>-induced changes in Plasma-MM. Scan rate was 0.5 frame/s.  
(continuation of Movie 2)

**Movie 6.** Cytcox-KH<sub>9</sub>-induced changes in Mito-MM. Scan rate was 0.5 frame/s.

**Movie 7.** BP100-KH<sub>9</sub>-induced changes in Mito-MM. Scan rate was 0.5 frame/s.
